# Supplementary material for: Incidence, Risk Factors, and Subsequent Complications of Postoperative Hematomas Requiring Reoperation After Primary Total Hip Arthroplasty
Source: Elsevier journal article supplement (doi:10.1016/j.artd.2022.08.008), 2022-12-14
Supplement: mmc7 [file mmc7.pdf]

**CONFLICT OF INTEREST STATEMENT**

*American Association of Hip and Knee Surgeons*

(Adopted from the American Academy of Orthopaedic Surgeons disclosure statement)

The following form **must be filled out completely and submitted by each author (example, 6 authors, 6 forms).**  
**All items require a response. If there is no relevant disclosure for a given item, enter "None."**

- 
1. Royalties from a company or supplier (The following conflicts were disclosed). None
  2. Speakers bureau/paid presentations for a company or supplier (The following conflicts were disclosed) None
  - 3A. Paid employee for a company or supplier (The following conflicts were disclosed) None
  - 3B. Paid consultant for a company or supplier (The following conflicts were disclosed) None
  - 3C. Unpaid consultants for a company or supplier (The following conflicts were disclosed) None
  4. Stock or stock options in a company or supplier (The following conflicts were disclosed) None
  5. Research support from a company or supplier as a Principal Investigator (The following conflicts were disclosed)  
None
  6. Other financial or material support from a company or supplier (The following conflicts were disclosed) None
  7. Royalties, financial or material support from publishers (The following conflicts were disclosed) None
  8. Medical/Orthopaedic publications editorial/governing board (The following conflicts were disclosed)  
North American Spine Society Journal
  9. Board member/committee appointments for a society (The following conflicts were disclosed)  
North American Spine Society Journal, Lumbar Spine Research Society, Cervical Spine Research Society

**Each author must sign AND print or type his/her name, date and submit a separate form**

In addition, one BLINDED Conflict of Interest form (no author names used) should be submitted per manuscript with all author disclosures.

Jonathan Grauer

Author Name (Print or Type)

  
Author Signature

8/2/21

Date
